# Supplementary material
Source: publisher site journal article supplement (https://www.dovepress.com/article/384196)
Supplement: Supplementary file 1 [file get_supplementary_file.php]

**Supporting Information for**

**Short-Wavelength Aggregation-Induced Emission Photosensitizers for Solid Tumor Therapy: Enhanced with White-light Fiber Optic**

*Zijuan Menga, Zhaojun Chena, Guangwen Lua, Xiaoqi Donga, Jun Daib*, Xiaoding Loua, Xia Fana*

*a Faculty of Materials Science and Chemistry, China University of Geosciences, Wuhan 430074, China.*

*b Department of Obstetrics and Gynecology, Tongji Hospital, Tongji Medical College, Huazhong University of Science and Technology, Wuhan 430034, China.*

**Figures and caption**


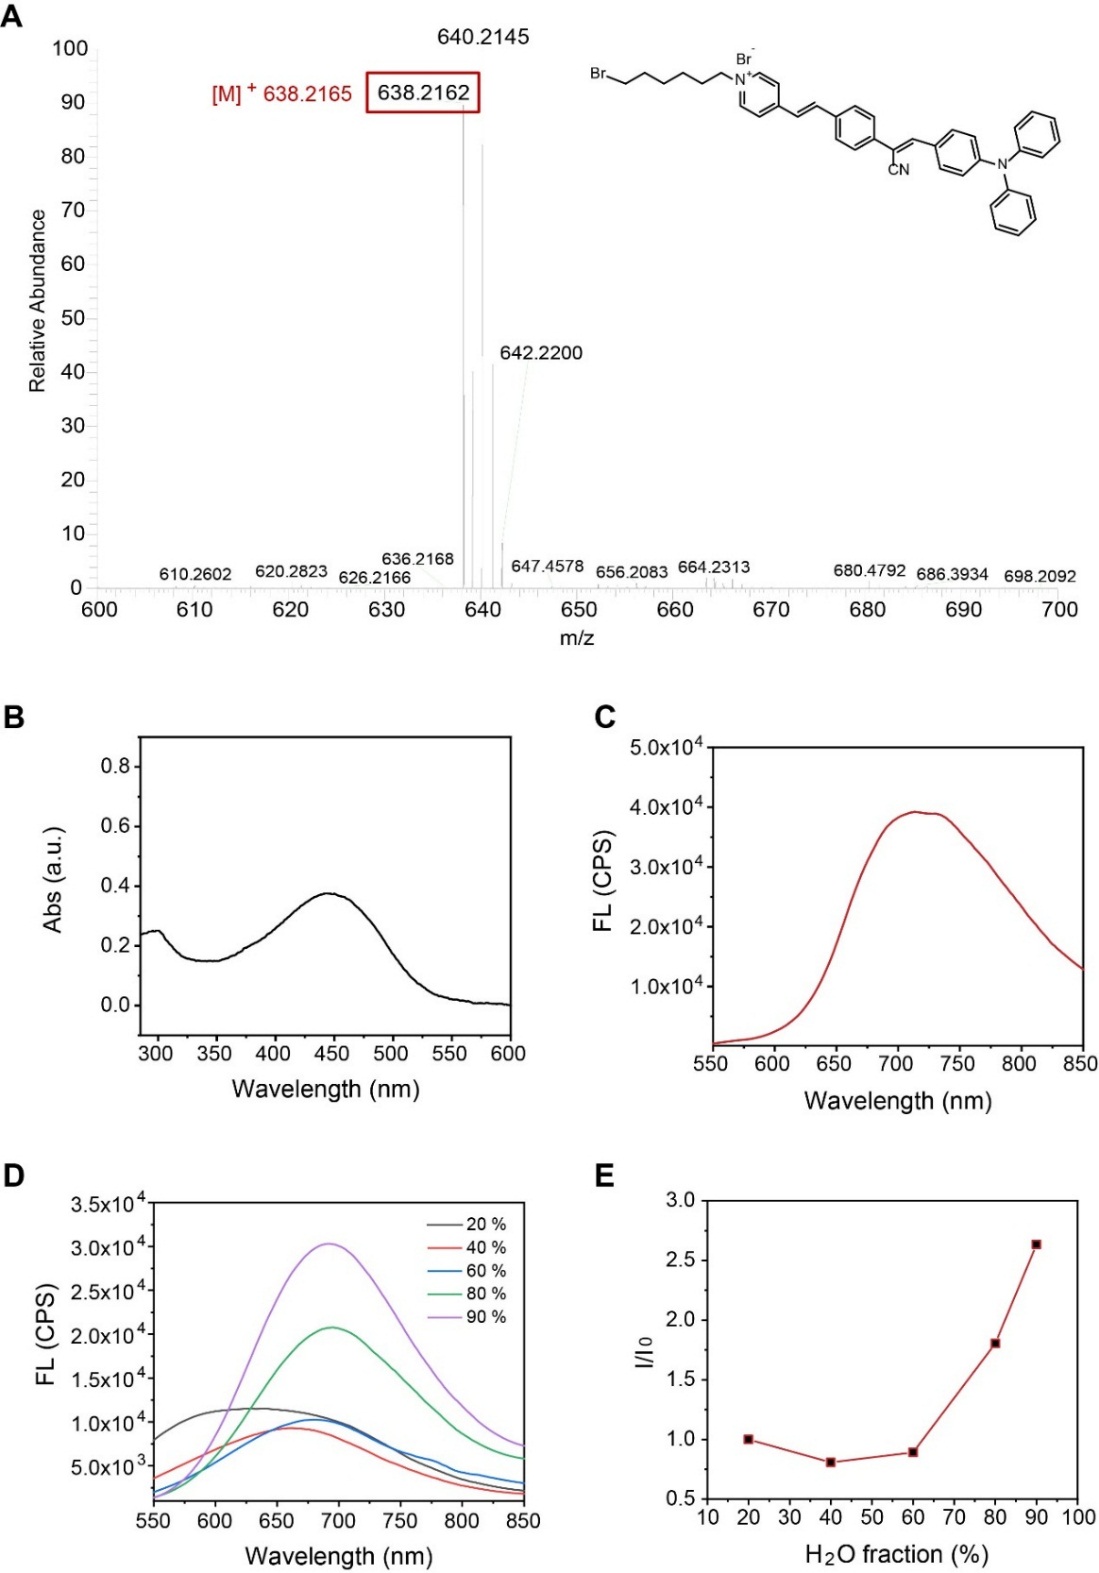


**Figure S1**. Characterization of PyTPA. (A) High resolution mass spectrum (HRMS) (MALDI-TOF) of PyTPA, [M]+ = 638.2162 (calcd 638.2165). (B) UV-vis absorption spectra of PyTPA. The concentration of PyTPA is 10 μM. (C) Fluorescence spectra of PyTPA. (D) Photoluminescence (PL) spectra of PyTPA in DMSO/water mixtures with different water fractions. (E) Plot of I/I0 values versus the compositions of the aqueous mixtures. I0 = emission intensity of PyTPA in DMSO. Eex = 450 nm.


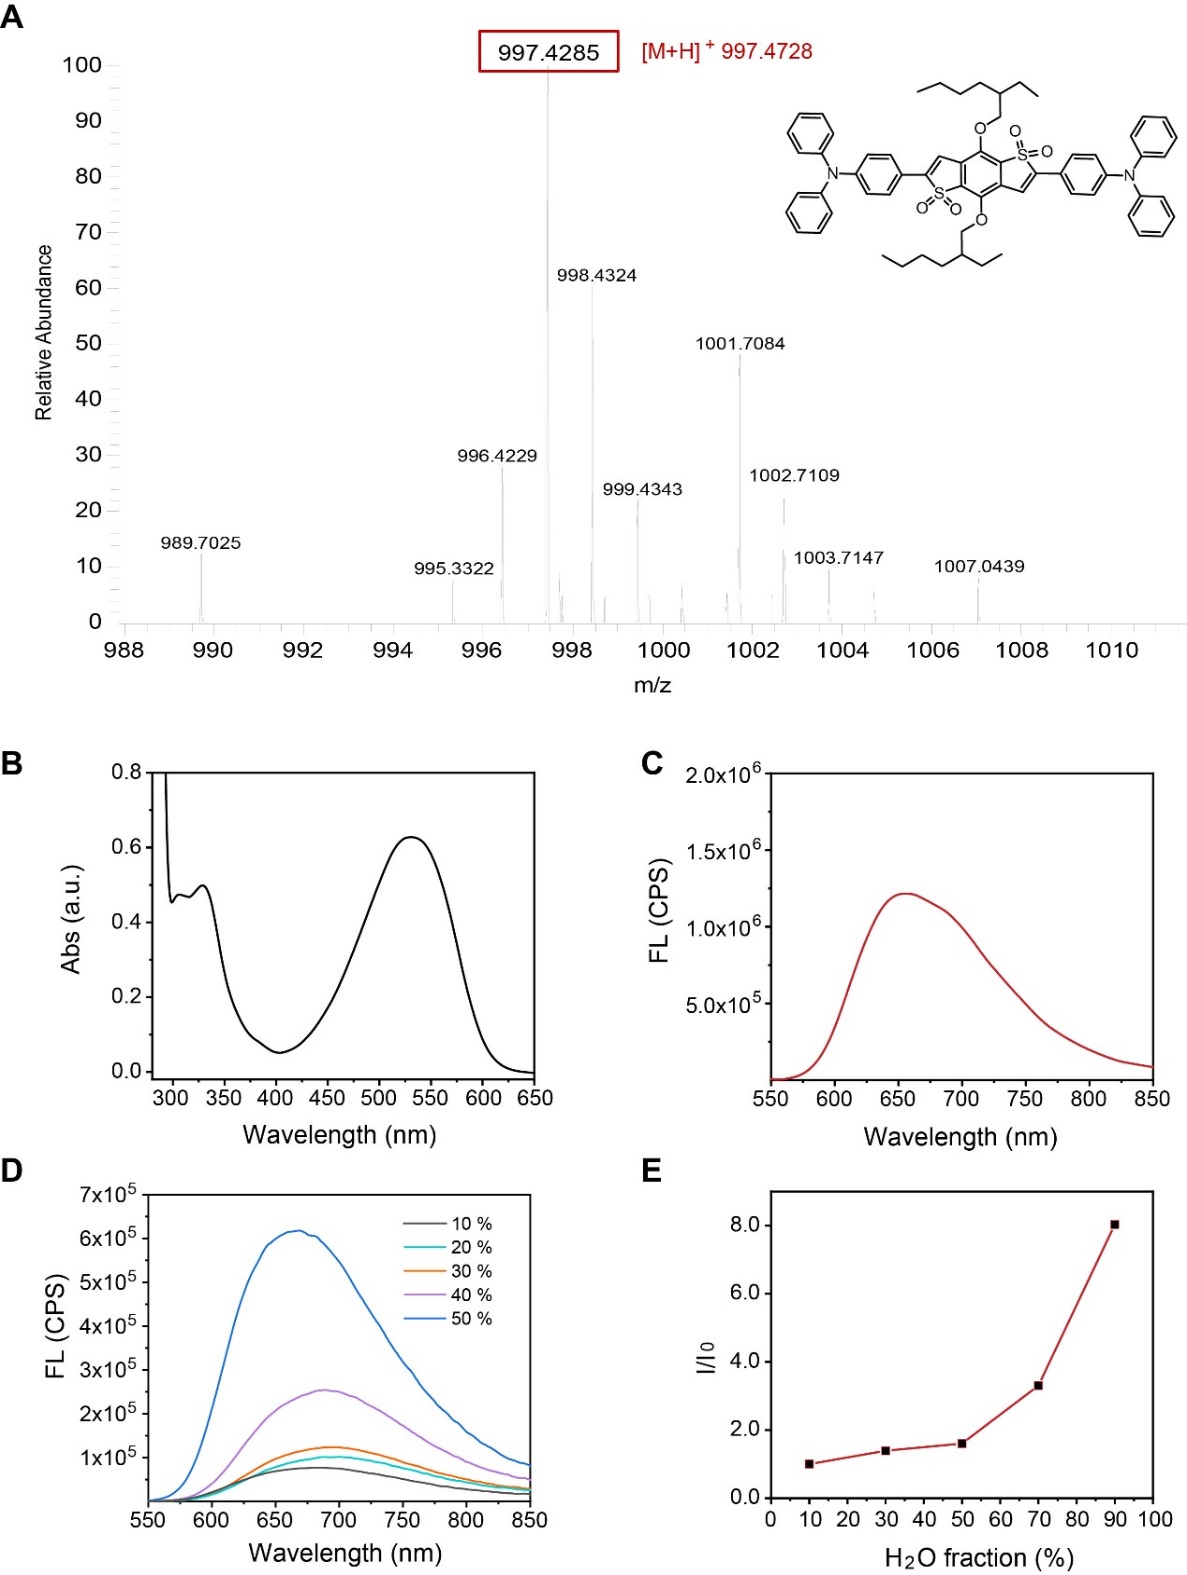


**Figure S2**. Characterization of TB. (A) High resolution mass spectrum (HRMS) (MALDI-TOF) of TB, [M+H]+ = 997.4728 (calcd 997.4285). (B) UV-vis absorption spectra of TB. The concentration of TB is 10 μM. (C) Fluorescence spectra of TB. (D) Photoluminescence (PL) spectra of TB in THF/water mixtures with different water fractions. (E) Plot of I/I0 values versus the compositions of the aqueous mixtures. I0 = emission intensity of TB in THF. Eex = 530 nm.


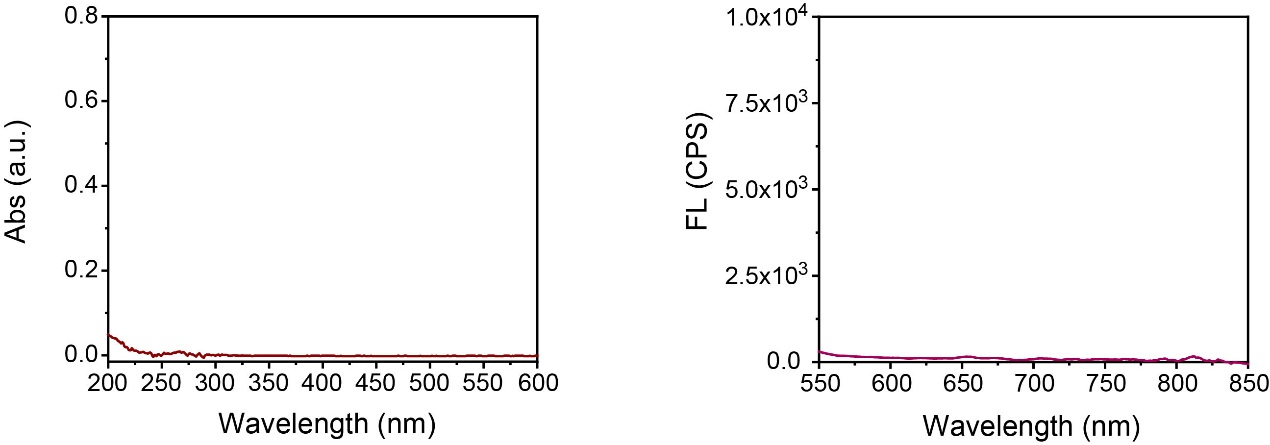


**Figure S3**. UV-vis absorption spectra of PEG. The concentration of PEG is 10 μM.

Fluorescence spectra of PEG.


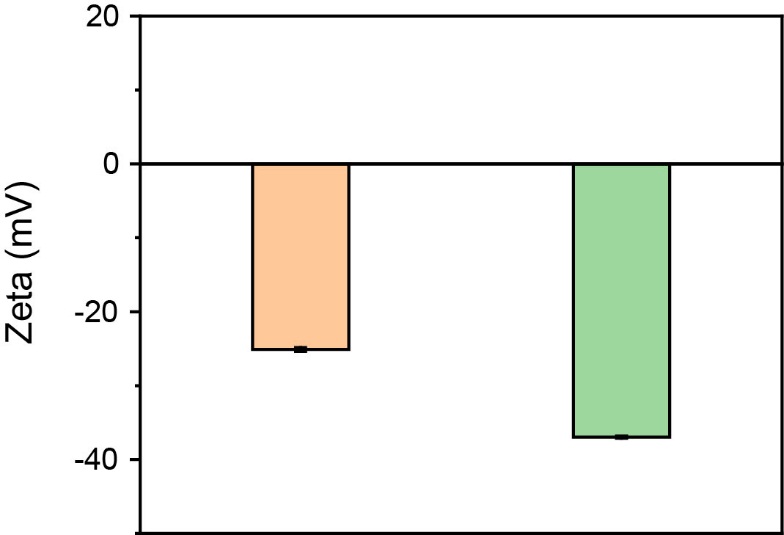


**Figure S4**. Zeta potential indicating the surface charges of PyTPA@PEG and TB@PEG NPs.


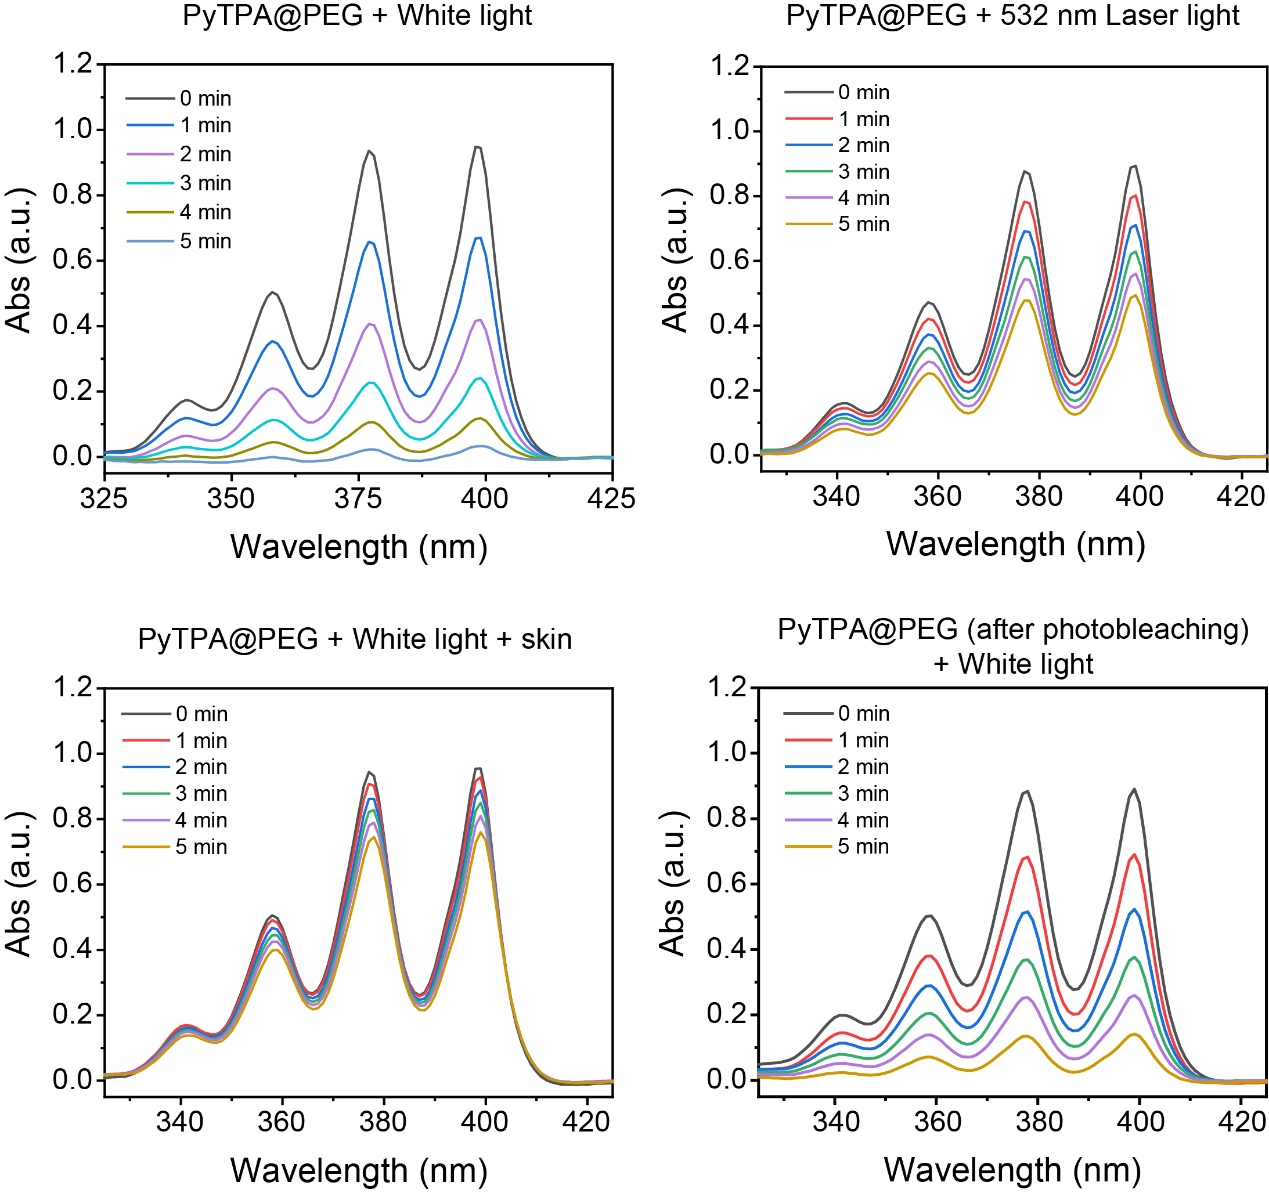


**Figure S5**. The UV-vis absorption spectrum of the ROS indicator ABDA mixed with PyTPA@PEG upon light irradiation (white light, 80 mW cm-2, 532 nm laser light, 80 mW cm-2, white light bleaching of 100mW cm-2 for 30 minutes).


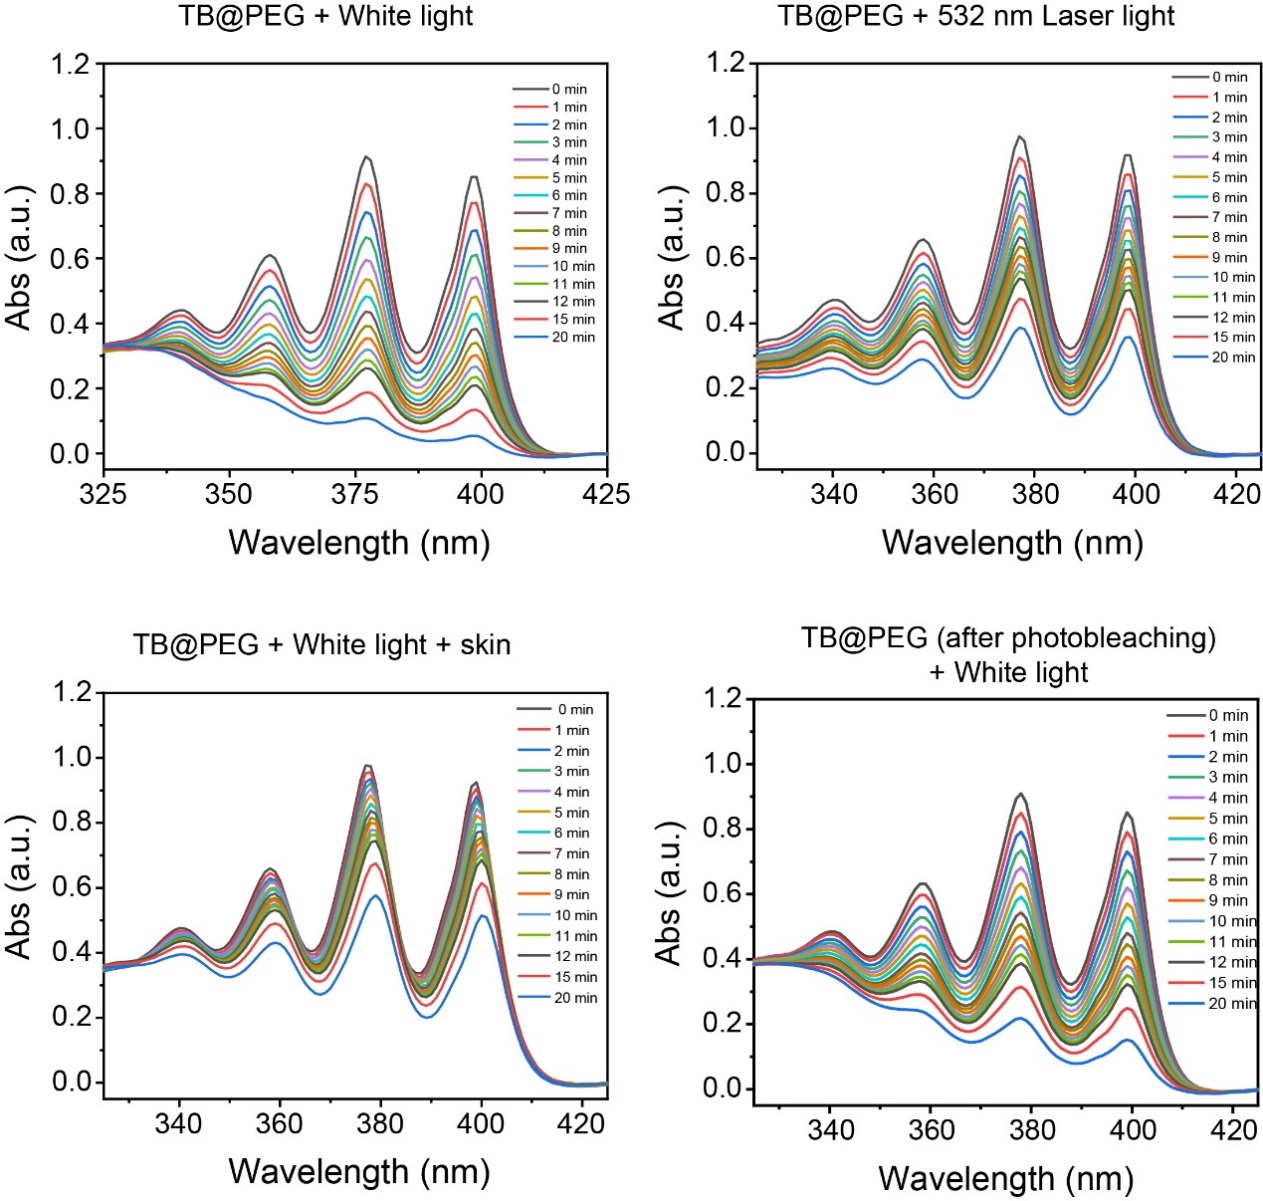
 **Figure S6**. The UV-vis absorption spectrum of the ROS indicator ABDA mixed with TB@PEG upon light irradiation (white light, 80 mW cm-2, 532 nm laser light, 80 mW cm-2, white light bleaching of 100mW cm-2 for 30 minutes).


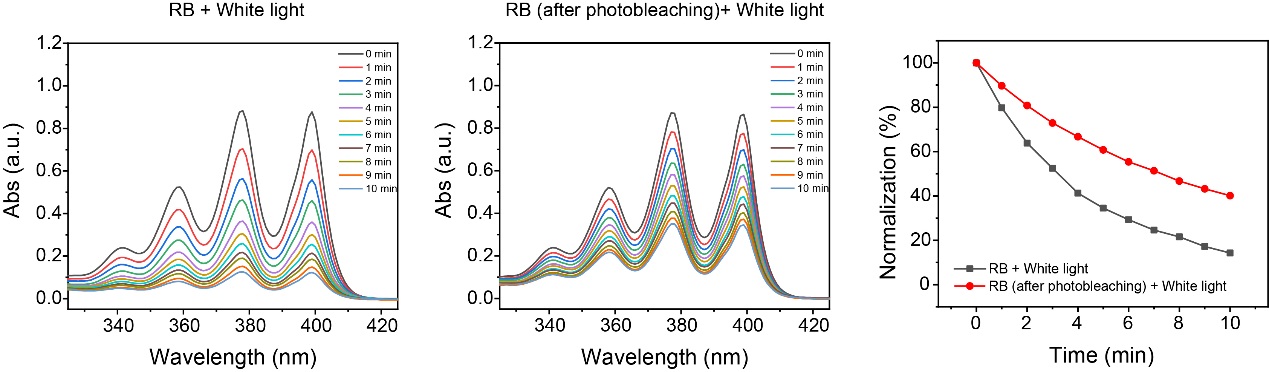
 **Figure S7**. The UV-vis absorption spectrum of the ROS indicator ABDA mixed with RB upon light irradiation (white light, 80 mW cm-2, white light bleaching of 100mW cm-2 for 30 minutes).


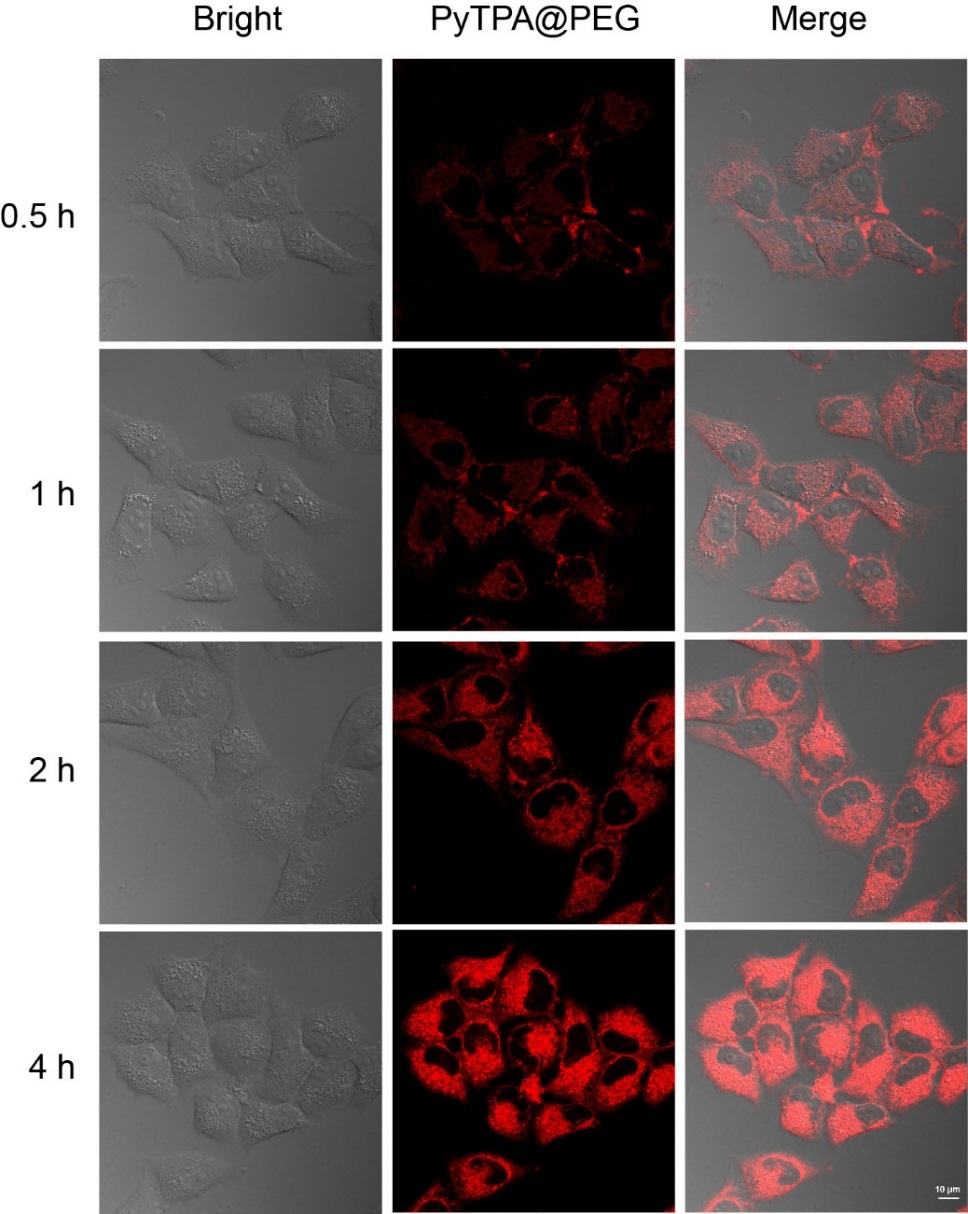


**Figure S8**. Hela cells were incubated with different time of PyTPA@PEG. CLSM was detected the intracellular fluorescence intensity. The concentration of PyTPA@PEG was 10 μM. PyTPA@PEG: Ex =405 nm, Em = 640-740 nm.


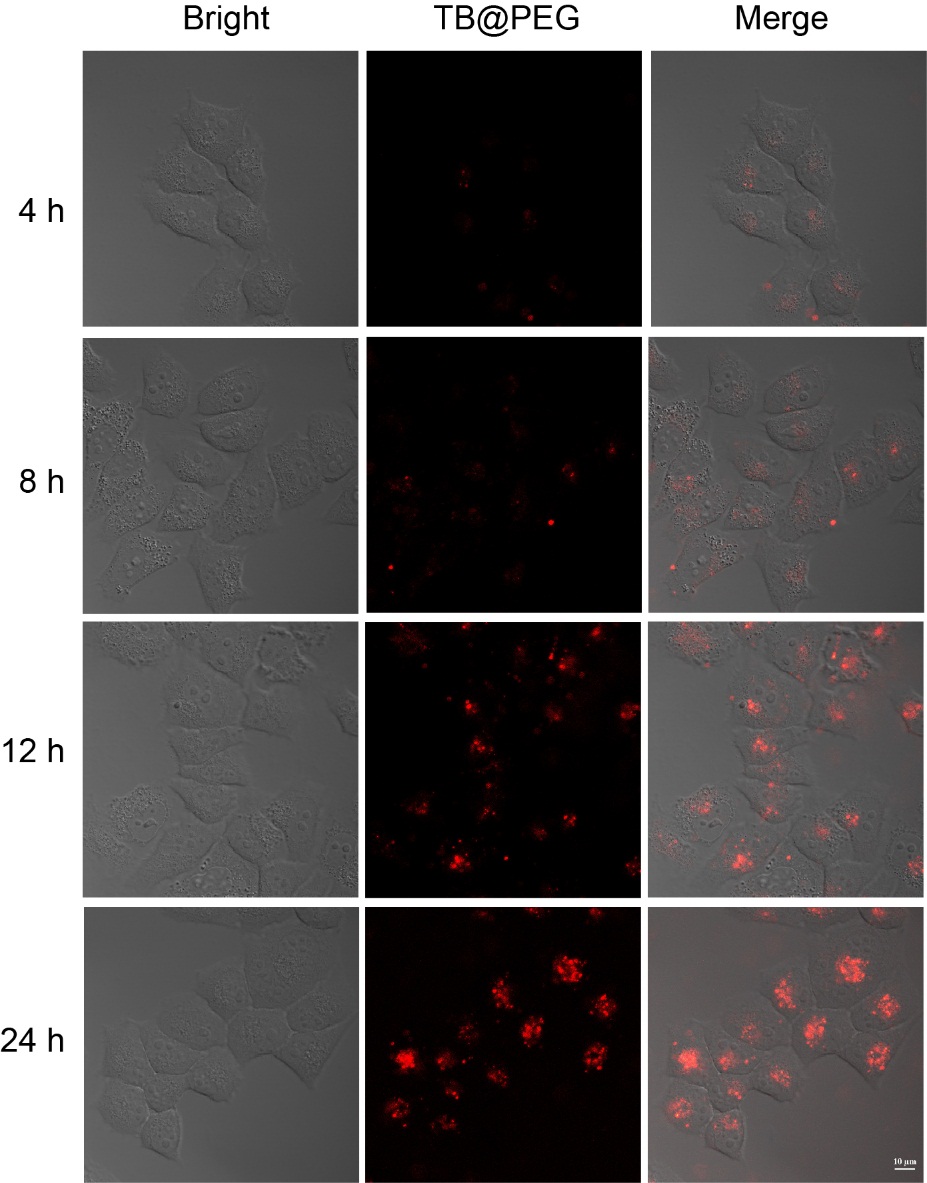


**Figure S9**. After incubation of Hela cells with TB@PEG NPs for 4 h, 8 h, 12 h and 24 h. CLSM assayed the NPs taken up by the cells. The concentration of TB@PEG NPs was 10 μM. TB@PEG: Ex = 543 nm, Em = 620-740 nm.


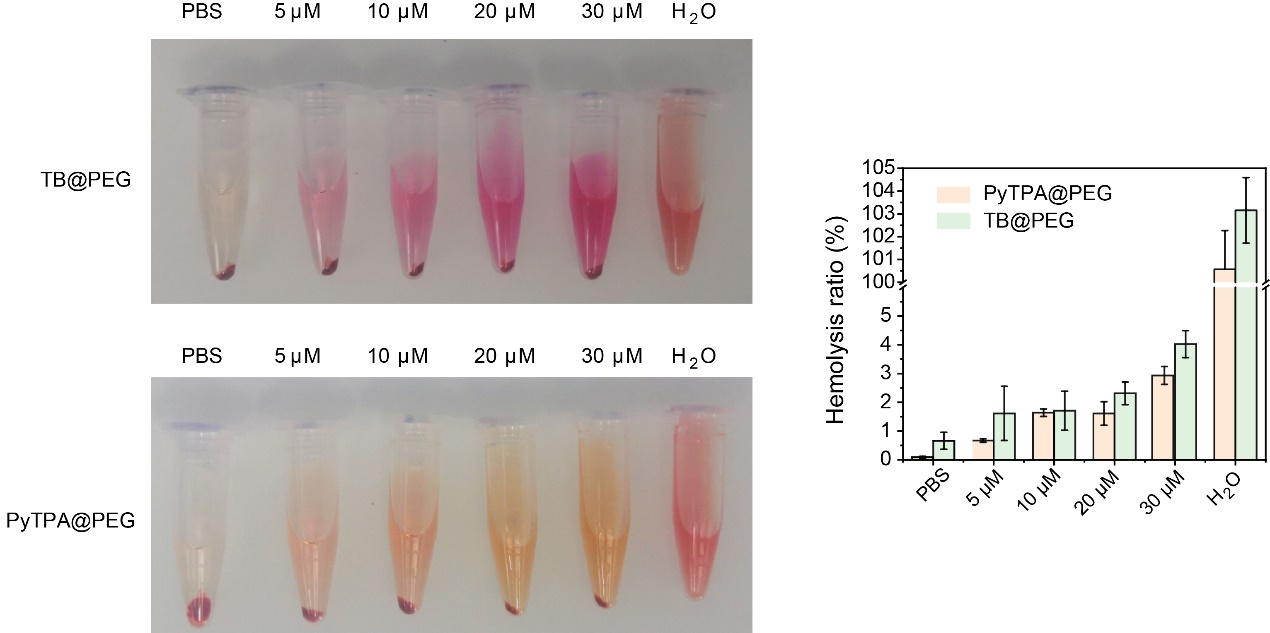


**Figure S10**. Hemolysis test after incubated with PBS (negative control), PyTPA@PEG, TB@PEG, and ultrapure water (positive control). The concentration of nanoparticles was 5μM, 10 μM, 20 μM and 30 μM, respectively. The results were presented as the mean ±SD (n = 3).


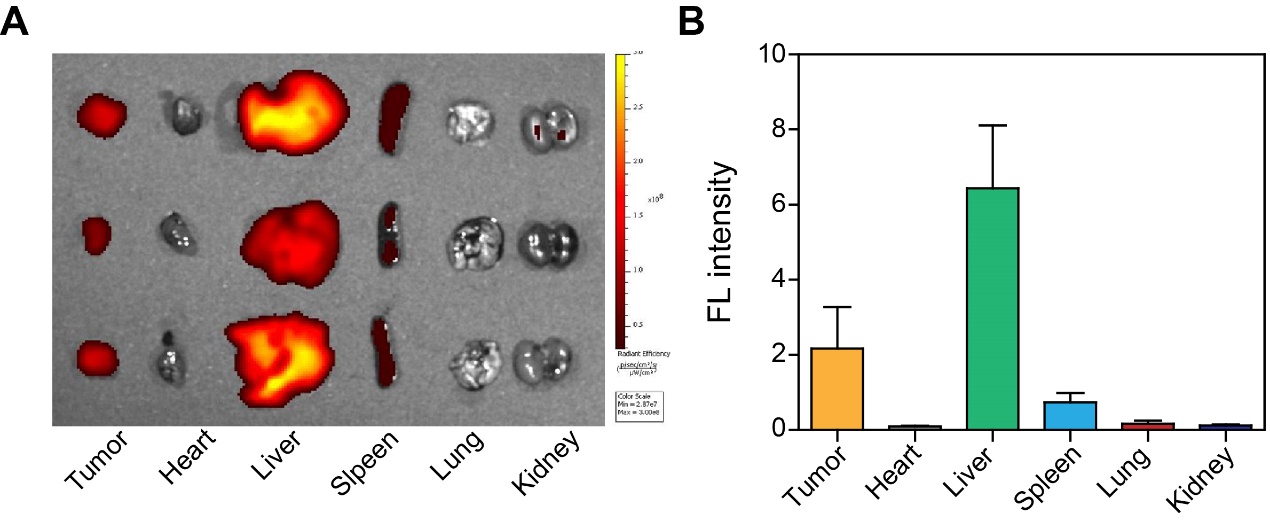


**Figure S11**. (A) Fluorescence images of TB@PEG in different organs and tumors 48 h after the tail vein injection. TB@PEG: Ex = 535 nm, Em = 680 nm. (B) Relative fluorescence intensity of TB@PEG in tumor, heart, liver, spleen, lung and kidney.


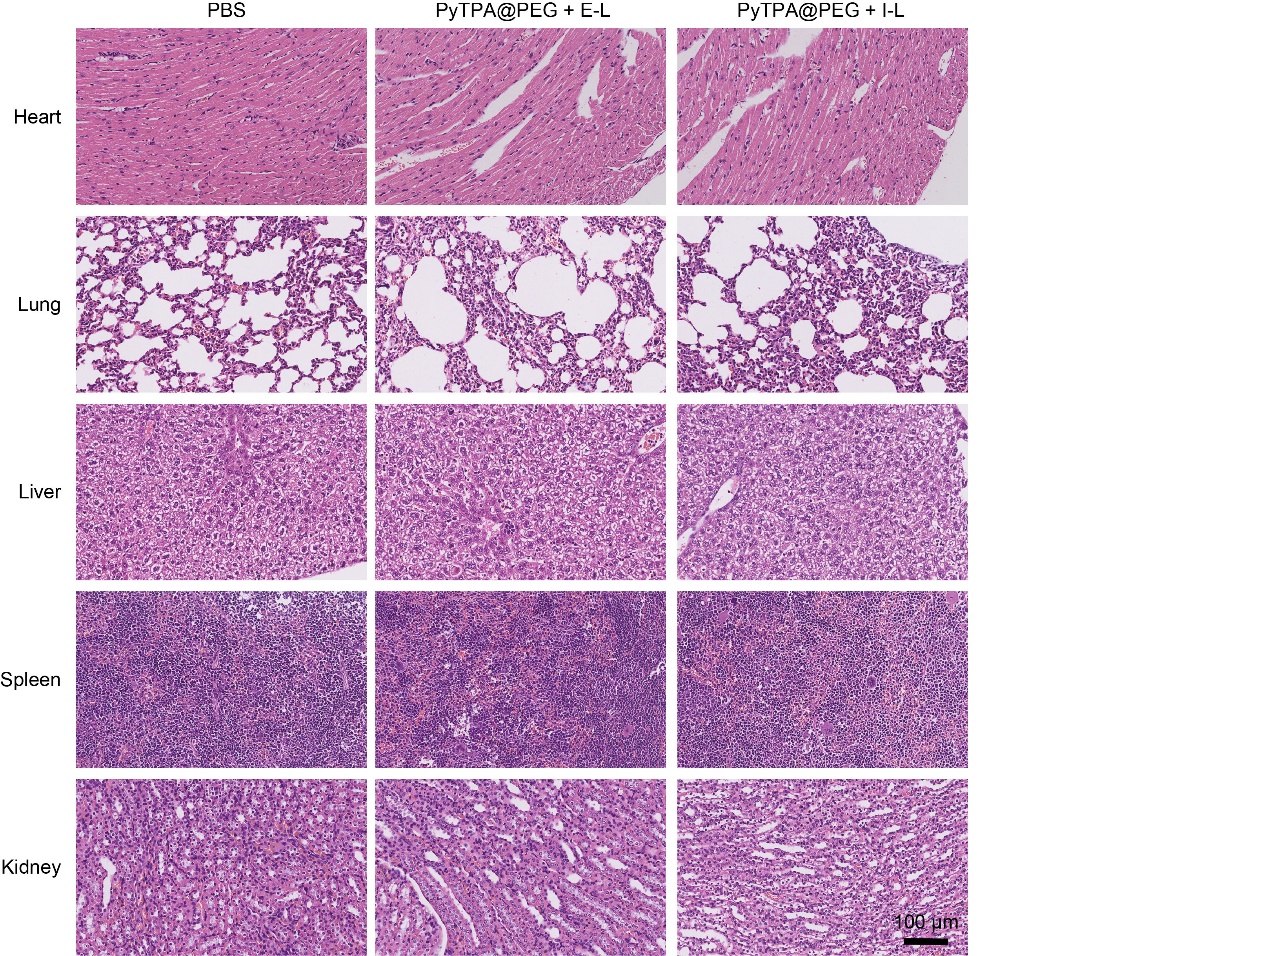
 **Figure S12**. The histological changes of heart, lung, liver, spleen and kidney were observed by H&E staining.


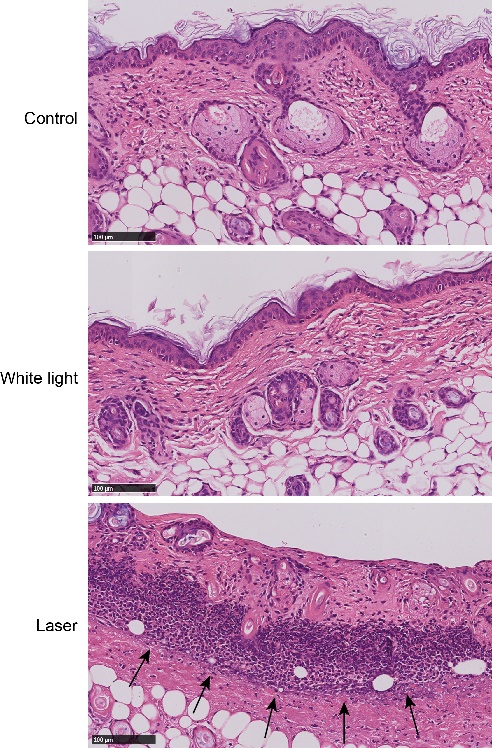


**Figure S13**. The histological changes of skin after white light (200 mW cm-2, 10 min) and laser irradiation (200 mW cm-2, 10 min) were observed by H&E staining. The black arrow indicated inflammatory cell infiltration.
